# Supplementary material for: Insights into the stability of gold nanoparticles supported on metal oxides for the base-free oxidation of glucose to gluconic acid
Source: Royal Society of Chemistry journal article supplement (doi:10.1039/c3gc41362d), 2013-08-15
Supplement: c3gc41362d.pdf [file c3gc41362d.pdf]

Electronic Supplementary Information for

## Insights into the stability of gold nanoparticles supported on metal oxides for the base-free oxidation of glucose to gluconic acid

Yuran Wang, Stijn Van de Vyver, Krishna K. Sharma and Yuriy Román-Leshkov\*

Department of Chemical Engineering, Massachusetts Institute of Technology,  
Cambridge, MA, 02139, USA.

\*To whom correspondence should be addressed. Email: yroman@mit.edu

### 1. Materials

D-glucose (>99.5%), potassium D-gluconate (>99%), D-gluconic acid solution (52.3 wt% in water), zirconium(IV) oxynitrate hydrate ( $\text{ZrO}(\text{NO}_3)_2 \cdot x\text{H}_2\text{O}$ , >99%), cerium(III) nitrate hexahydrate ( $\text{Ce}(\text{NO}_3)_3 \cdot 6\text{H}_2\text{O}$ , >99%), nanosized titanium(IV) oxide ( $\text{TiO}_2$ ,  $\geq 99.5\%$ ), microsized cerium(IV) oxide ( $\text{CeO}_2$ , 99.9%), microsized zirconium(IV) oxide ( $\text{ZrO}_2$ , 99%), microsized titanium(IV) oxide ( $\text{TiO}_2$ ,  $\geq 99\%$ ), activated carbon (DARCO<sup>®</sup>, 100 mesh), gold(III) chloride trihydrate ( $\text{HAuCl}_4 \cdot 3\text{H}_2\text{O}$ ,  $\geq 99.9\%$ ), sodium hydroxide ( $\text{NaOH}$ , >98%), and poly(vinyl alcohol) (>99%) were purchased from Sigma-Aldrich and used as received.

### 2. Nitrogen physisorption

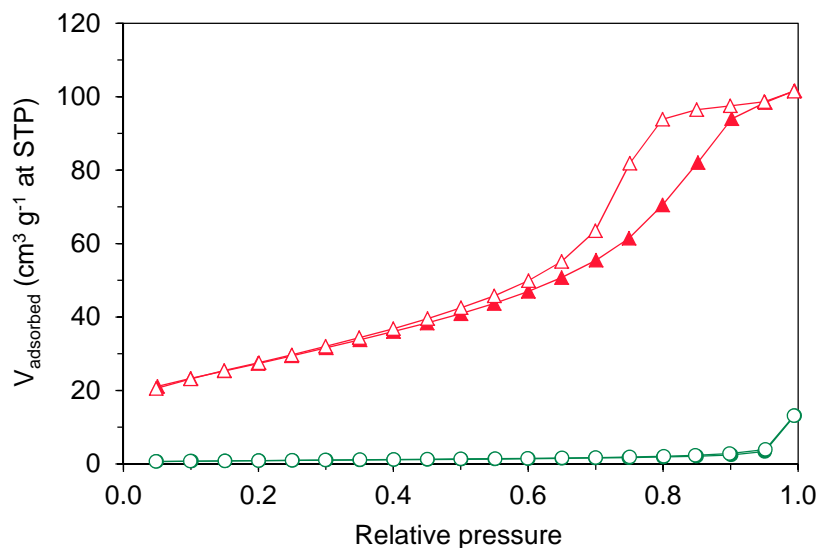

**Fig. S1**  $\text{N}_2$  adsorption/desorption isotherms of  $\mu\text{CeO}_2$  (green circles) and  $n\text{CeO}_2$  (red triangles).

### 3. Thermogravimetric analysis

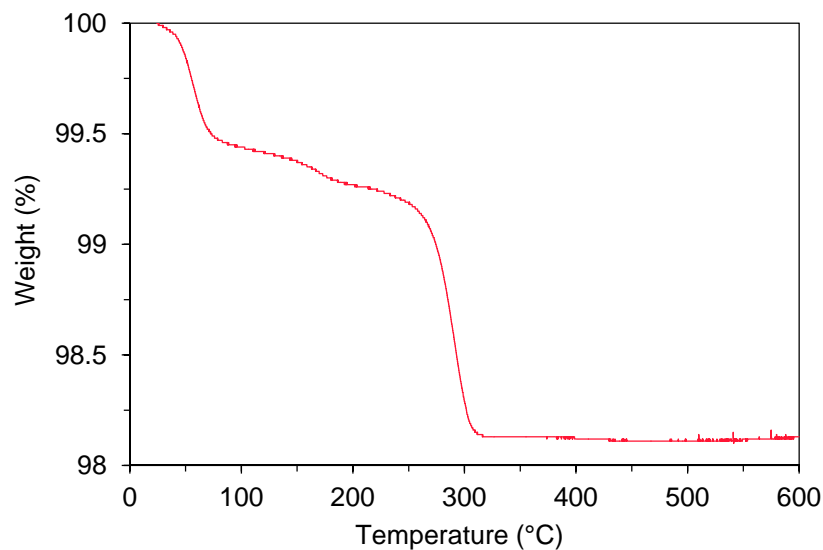

**Fig. S2** TGA curve of the 0.02 wt% Au/ $\mu$ CeO<sub>2</sub> catalyst after 72 h reaction with glucose. Reaction conditions: see Fig. 4 in the manuscript.

### 4. Au particle size distribution histograms

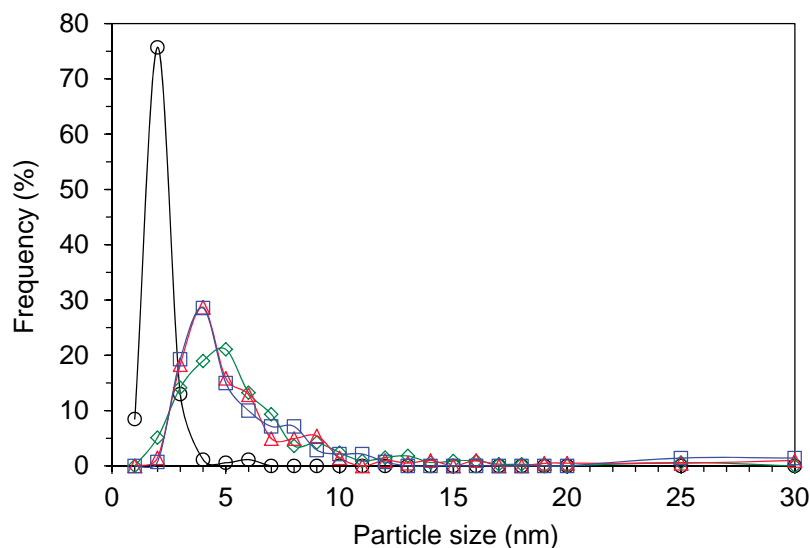

**Fig. S3** Au particle size distribution histograms of 0.02 wt% Au/ $\mu$ CeO<sub>2</sub>: as-synthesized (black circles), after 72 h reaction with glucose and washing with deionized water (green diamonds), after regeneration by calcination at 225 °C (red triangles), and after regeneration by calcination at 325 °C (blue squares). Particle sizes were  $1.7 \pm 0.6$ ,  $5.3 \pm 3.2$ ,  $5.2 \pm 3.8$  and  $5.7 \pm 5.5$ , respectively. Reaction conditions: see Fig. 4 in the manuscript.
